# Supplementary material for: Multicentre cross-sectional observational registry to monitor the safety of early discharge after rule-out of acute myocardial infarction by copeptin and troponin: the Pro-Core registry
Source: PubMed Central journal article supplement — BMJ Open. 2019 Jul 23;9(7):e028311. doi: 10.1136/bmjopen-2018-028311 (PMC6661885; doi:10.1136/bmjopen-2018-028311), 2019-07-23
Supplement: bmjopen-2018-028311supp002.pdf [file bmjopen-2018-028311supp002.pdf]

## Summary of ethics approval

- The principle ethics vote is from the principal investigator site, Charité (Berlin). Reference number EA1/00815, on the 05.06.2015
- Some German participant centres (Mayen, Hedwigshohe, UKB) accepted the ethics approval from the principal investigator site (Charité, Berlin).  
All the local ethics committee were informed accordingly.
- Bad Nauheim: The ACS Registry was approved by the ethical board of the Justus-Liebig-University Giessen (FF 17/2011)
- Frankfurt: The ProCore Registry was approved by the ethical board of the Goethe-University Frankfurt (318/15)
- Heidelberg: The ProCore Registry was approved by the ethical board of the Medizinische Fakultät Heidelberg (S-382/2015)
- The principle Austrian ethics vote is from the Vienna university hospital (Reference number EK-15-198-1015 on the 28<sup>th</sup> of October 2016)
- The hospital of Tulln accepted the Austrian ethics vote from Vienna.
- The principle Swiss ethics vote is from the Zollikerberg (Zurich) hospital (reference number BASEC 2016-00401 on the 13.03.2016)
- The Aarau hospital accepted the Swiss ethics vote from Zurich on the 14.12.2016
- High Wycombe hospital ethics vote approved the study with the following REC reference number: 16/SC/0198, IRAS project ID:193406
- The Ankara university hospital accepted the ethics vote from the principal investigator site, Charité (Berlin)
- The Budapest university hospital accepted the ethics vote from the principal investigator site, Charité (Berlin)
- The Vilnius University hospital accepted the ethics vote from the principal investigator site, Charité (Berlin)
- The French participants centres (Calais, Montpellier, Dijon) were using the dual marker strategy in routine; the local ethics committee was informed and accepted the data anonymisation of the electronic case report form.
